# Supplementary material for: Next-Generation Sequencing-Based Quantitative Detection of Hepatitis B Virus Pre-S Mutants in Plasma Predicts Hepatocellular Carcinoma Recurrence
Source: MDPI journal article supplement (doi:10.3390/v12080796), 2020-07-24
Supplement: s1 [file s1]

**Table S1. List of the pre-S genotyping results by TA cloning- and NGS-based analyses in 75 HBV-related HCC patients**

| Patient No. | TA Cloning Result <sup>a</sup>               | NGS Result (Pre-S Del Type (%)) <sup>b</sup>                                                                                                                                                                                                                                                                                  | NGS Result (Pre-S Del Region (%)) <sup>c</sup>                                                                                                          |
|-------------|----------------------------------------------|-------------------------------------------------------------------------------------------------------------------------------------------------------------------------------------------------------------------------------------------------------------------------------------------------------------------------------|---------------------------------------------------------------------------------------------------------------------------------------------------------|
| 1           | pre-S1 del (nt 2855-2872)                    | 1. <b>pre-S1 del (92.118)<sup>d</sup></b><br>2. <b>wild-type (7.278)</b><br>3. pre-S2 del (0.372)<br>4. pre-S1+pre-S2 del (0.231)<br>I. pre-S1 plus pre-S2 del (92.490) <sup>e</sup><br>II. pre-S1 plus pre-S1+pre-S2 del (92.349)<br>III. pre-S2 plus pre-S1+pre-S2 del (0.603)<br>IV. all three types of pre-S del (92.722) | 1. pre-S1 del (nt 2855-2872) (90.102)<br>2. wild-type (7.278)<br>3. pre-S2 del (nt 1-28) (0.180)<br>4. pre-S1+pre-S2 del (nt 2855-2872, 1-111) (0.027)  |
| 2           | 1. wild-type<br>2. pre-S1 del (nt 2910-3089) | 1. <b>pre-S1 del (75.241)</b><br>2. <b>wild-type (22.338)</b><br>3. pre-S2 del (1.891)<br>4. pre-S1+pre-S2 del (0.530)<br>I. pre-S1 plus pre-S2 del (77.132)<br>II. pre-S1 plus pre-S1+pre-S2 del (75.771)<br>III. pre-S2 plus pre-S1+pre-S2 del (2.421)<br>IV. all three types of pre-S del (77.662)                         | 1. pre-S1 del (nt 2910-3089) (48.977)<br>2. wild-type (22.338)<br>3. pre-S2 del (nt 1-54) (1.579)<br>4. pre-S1+pre-S2 del (nt 2910-3089, 1-57) (0.277)  |
| 3           | wild-type                                    | 1. <b>pre-S1 del (76.228)</b><br>2. <b>wild-type (12.583)</b><br>3. <b>pre-S2 del (10.622)</b><br>4. pre-S1+pre-S2 del (0.567)<br>I. pre-S1 plus pre-S2 del (86.850)<br>II. pre-S1 plus pre-S1+pre-S2 del (76.795)<br>III. pre-S2 plus pre-S1+pre-S2 del (11.189)<br>IV. all three types of pre-S del (87.417)                | 1. pre-S1 del (nt 3110-3127) (24.869)<br>2. wild-type (12.583)<br>3. pre-S2 del (nt 1-57) (10.000)<br>4. pre-S1+pre-S2 del (nt 2855-2872, 1-57) (0.490) |

|   |                       |                                                                                                                                                                                                                                                                                                       |                                                                                                                                                             |
|---|-----------------------|-------------------------------------------------------------------------------------------------------------------------------------------------------------------------------------------------------------------------------------------------------------------------------------------------------|-------------------------------------------------------------------------------------------------------------------------------------------------------------|
| 4 | wild-type             | 1. <b>wild-type (71.590)</b><br>2. <b>pre-S1 del (28.270)</b><br>3. pre-S2 del (0.129)<br>4. pre-S1+pre-S2 del (0.011)<br>I. pre-S1 plus pre-S2 del (28.399)<br>II. pre-S1 plus pre-S1+pre-S2 del (28.281)<br>III. pre-S2 plus pre-S1+pre-S2 del (0.140)<br>IV. all three types of pre-S del (28.410) | 1. wild-type (71.590)<br>2. pre-S1 del (nt 2854-3147) (23.961)<br>3. pre-S2 del (nt 3211-3216) (0.048)<br>4. pre-S1+pre-S2 del (nt 2954-3097, 1-54) (0.002) |
| 5 | pre-S2 del (nt 24-50) | 1. <b>wild-type (58.461)</b><br>2. <b>pre-S2 del (37.194)</b><br>3. pre-S1 del (2.939)<br>4. pre-S1+pre-S2 del (1.407)<br>I. pre-S1 plus pre-S2 del (40.133)<br>II. pre-S1 plus pre-S1+pre-S2 del (4.346)<br>III. pre-S2 plus pre-S1+pre-S2 del (38.601)<br>IV. all three types of pre-S del (41.539) | 1. wild-type (58.461)<br>2. pre-S2 del (nt 24-50) (33.801)<br>3. pre-S1 del (nt 2880-3146) (0.646)<br>4. pre-S1+pre-S2 del (nt 2880-3146, 24-50) (0.355)    |
| 6 | wild-type             | 1. <b>wild-type (96.592)</b><br>2. pre-S1 del (2.906)<br>3. pre-S2 del (0.469)<br>4. pre-S1+pre-S2 del (0.033)<br>I. pre-S1 plus pre-S2 del (3.375)<br>II. pre-S1 plus pre-S1+pre-S2 del (2.939)<br>III. pre-S2 plus pre-S1+pre-S2 del (0.502)<br>IV. all three types of pre-S del (3.408)            | 1. wild-type (96.592)<br>2. pre-S1 del (nt 3026-3205) (0.604)<br>3. pre-S2 del (nt 1-12) (0.233)<br>4. pre-S1+pre-S2 del (nt 2854-2979, 6-134) (0.008)      |
| 7 | wild-type             | 1. <b>wild-type (99.000)</b><br>2. pre-S1 del (0.927)                                                                                                                                                                                                                                                 | 1. wild-type (99.000)<br>2. pre-S1 del (nt 3106-3129) (0.294)                                                                                               |

|    |           |                                                                                                                                                                                                                                                                                                                        |                                                                                                                                                            |
|----|-----------|------------------------------------------------------------------------------------------------------------------------------------------------------------------------------------------------------------------------------------------------------------------------------------------------------------------------|------------------------------------------------------------------------------------------------------------------------------------------------------------|
|    |           | 3. pre-S2 del (0.062)<br>4. pre-S1+pre-S2 del (0.012)<br>I. pre-S1 plus pre-S2 del (0.989)<br>II. pre-S1 plus pre-S1+pre-S2 del (0.939)<br>III. pre-S2 plus pre-S1+pre-S2 del (0.074)<br>IV. all three types of pre-S del (1.000)                                                                                      | 3. pre-S2 del (nt 1-54) (0.031)<br>4. pre-S1+pre-S2 del (nt 2855-2972, 1-54) (0.008)                                                                       |
| 8  | wild-type | 1. <b>wild-type (93.746)</b><br>2. <b>pre-S1 del (5.846)</b><br>3. pre-S2 del (0.389)<br>4. pre-S1+pre-S2 del (0.018)<br>I. pre-S1 plus pre-S2 del (6.235)<br>II. pre-S1 plus pre-S1+pre-S2 del (5.864)<br>III. pre-S2 plus pre-S1+pre-S2 del (0.407)<br>IV. all three types of pre-S del (6.254)                      | 1. wild-type (93.746)<br>2. pre-S1 del (nt 3026-3205) (2.417)<br>3. pre-S2 del (nt 3211-3213) (0.135)<br>4. pre-S1+pre-S2 del (nt 2856-2873, 1-21) (0.004) |
| 9  | wild-type | 1. <b>pre-S1+pre-S2 del (46.237)</b><br>2. <b>pre-S2 del (26.927)</b><br>3. <b>pre-S1 del (14.368)</b><br>4. <b>wild-type (12.467)</b><br>I. pre-S1 plus pre-S2 del (41.295)<br>II. pre-S1 plus pre-S1+pre-S2 del (60.605)<br>III. pre-S2 plus pre-S1+pre-S2 del (73.164)<br>IV. all three types of pre-S del (87.533) | 1. pre-S1+pre-S2 del (nt 2956-3126, 1-9) (24.002)<br>2. pre-S2 del (nt 1-54) (23.226)<br>3. pre-S1 del (nt 2944-3075) (5.140)<br>4. wild-type (12.467)     |
| 10 | wild-type | 1. <b>wild-type (97.851)</b><br>2. pre-S1 del (2.037)<br>3. pre-S2 del (0.108)<br>4. pre-S1+pre-S2 del (0.005)                                                                                                                                                                                                         | 1. wild-type (97.851)<br>2. pre-S1 del (nt 3026-3205) (1.109)<br>3. pre-S2 del (nt 3211-3213) (0.049)<br>4. pre-S1+pre-S2 del (nt 2855-2872, 1-54) (0.003) |

|    |           |                                                                                                                                                                                                                                                                                            |                                                                                                                                                              |
|----|-----------|--------------------------------------------------------------------------------------------------------------------------------------------------------------------------------------------------------------------------------------------------------------------------------------------|--------------------------------------------------------------------------------------------------------------------------------------------------------------|
|    |           | I. pre-S1 plus pre-S2 del (2.145)<br>II. pre-S1 plus pre-S1+pre-S2 del (2.042)<br>III. pre-S2 plus pre-S1+pre-S2 del (0.113)<br>IV. all three types of pre-S del (2.149)                                                                                                                   |                                                                                                                                                              |
| 11 | wild-type | 1. <b>wild-type (98.964)</b><br>2. pre-S1 del (0.943)<br>3. pre-S2 del (0.084)<br>4. pre-S1+pre-S2 del (0.009)<br>I. pre-S1 plus pre-S2 del (1.027)<br>II. pre-S1 plus pre-S1+pre-S2 del (0.952)<br>III. pre-S2 plus pre-S1+pre-S2 del (0.093)<br>IV. all three types of pre-S del (1.036) | 1. wild-type (98.964)<br>2. pre-S1 del (nt 2854-2970) (0.125)<br>3. pre-S2 del (nt 1-9) (0.028)<br>4. pre-S1+pre-S2 del (nt 2954-3097, 1-13) (0.009)         |
| 12 | wild-type | 1. <b>wild-type (97.781)</b><br>2. pre-S1 del (2.099)<br>3. pre-S2 del (0.112)<br>4. pre-S1+pre-S2 del (0.008)<br>I. pre-S1 plus pre-S2 del (2.211)<br>II. pre-S1 plus pre-S1+pre-S2 del (2.107)<br>III. pre-S2 plus pre-S1+pre-S2 del (0.120)<br>IV. all three types of pre-S del (2.219) | 1. wild-type (97.781)<br>2. pre-S1 del (nt 3026-3205) (1.099)<br>3. pre-S2 del (nt 3211-3216) (0.055)<br>4. pre-S1+pre-S2 del (nt 3026-3205, 43-138) (0.002) |
| 13 | wild-type | 1. <b>wild-type (92.291)</b><br>2. pre-S1 del (4.092)<br>3. pre-S2 del (3.038)<br>4. pre-S1+pre-S2 del (0.578)<br>I. pre-S1 plus pre-S2 del (7.130)<br>II. pre-S1 plus pre-S1+pre-S2 del (4.670)                                                                                           | 1. wild-type (92.291)<br>2. pre-S1 del (nt 2854-2970) (0.650)<br>3. pre-S2 del (nt 1-54) (2.641)<br>4. pre-S1+pre-S2 del (nt 2855-2872, 1-54) (0.435)        |

|    |           |                                                                                                                                                                                                                                                                                                                        |                                                                                                                                                                              |
|----|-----------|------------------------------------------------------------------------------------------------------------------------------------------------------------------------------------------------------------------------------------------------------------------------------------------------------------------------|------------------------------------------------------------------------------------------------------------------------------------------------------------------------------|
|    |           | III. pre-S2 plus pre-S1+pre-S2 del (3.616)                                                                                                                                                                                                                                                                             |                                                                                                                                                                              |
|    |           | IV. all three types of pre-S del (7.709)                                                                                                                                                                                                                                                                               |                                                                                                                                                                              |
| 14 | wild-type | 1. <b>wild-type (69.001)</b><br>2. <b>pre-S1 del (20.530)</b><br>3. <b>pre-S2 del (9.463)</b><br>4. pre-S1+pre-S2 del (1.006)<br>I. pre-S1 plus pre-S2 del (29.993)<br>II. pre-S1 plus pre-S1+pre-S2 del (21.536)<br>III. pre-S2 plus pre-S1+pre-S2 del (10.469)<br>IV. all three types of pre-S del (31.999)          | 1. wild-type (69.001)<br>2. pre-S1 del (nt 3110-3127) (4.779)<br>3. pre-S2 del (nt 1-54) (8.226)<br>4. pre-S1+pre-S2 del (nt 2855-2872, 1-18, 26-59) (0.259)                 |
| 15 | wild-type | 1. <b>wild-type (50.938)</b><br>2. <b>pre-S1 del (19.760)</b><br>3. <b>pre-S1+pre-S2 del (15.021)</b><br>4. <b>pre-S2 del (14.280)</b><br>I. pre-S1 plus pre-S2 del (34.040)<br>II. pre-S1 plus pre-S1+pre-S2 del (34.781)<br>III. pre-S2 plus pre-S1+pre-S2 del (29.301)<br>IV. all three types of pre-S del (49.062) | 1. wild-type (50.938)<br>2. pre-S1 del (nt 2854-2970) (5.470)<br>3. pre-S1+pre-S2 del (nt 2855-2872, 1-54) (12.421)<br>4. pre-S2 del (nt 1-54) (13.606)                      |
| 16 | wild-type | 1. <b>wild-type (75.230)</b><br>2. <b>pre-S1+pre-S2 del (13.878)</b><br>3. <b>pre-S1 del (10.730)</b><br>4. pre-S2 del (0.162)<br>I. pre-S1 plus pre-S2 del (10.892)<br>II. pre-S1 plus pre-S1+pre-S2 del (24.608)<br>III. pre-S2 plus pre-S1+pre-S2 del (14.040)<br>IV. all three types of pre-S del (24.770)         | 1. wild-type (75.230)<br>2. pre-S1+pre-S2 del (nt 2860-2880, 2954-3097, 1-15) (11.572)<br>3. pre-S1 del (nt 2860-2880, 2954-3097) (9.550)<br>4. pre-S2 del (nt 1-15) (0.138) |

|    |           |                                                                                                                                                                                                                                                                                            |                                                                                                                                                          |
|----|-----------|--------------------------------------------------------------------------------------------------------------------------------------------------------------------------------------------------------------------------------------------------------------------------------------------|----------------------------------------------------------------------------------------------------------------------------------------------------------|
| 17 | wild-type | 1. <b>wild-type (98.571)</b><br>2. pre-S1 del (1.173)<br>3. pre-S2 del (0.178)<br>4. pre-S1+pre-S2 del (0.078)<br>I. pre-S1 plus pre-S2 del (1.351)<br>II. pre-S1 plus pre-S1+pre-S2 del (1.251)<br>III. pre-S2 plus pre-S1+pre-S2 del (0.256)<br>IV. all three types of pre-S del (1.429) | 1. wild-type (98.571)<br>2. pre-S1 del (nt 3106-3129) (0.242)<br>3. pre-S2 del (nt 2-149) (0.043)<br>4. pre-S1+pre-S2 del (nt 2854-2985, 27-149) (0.014) |
| 18 | wild-type | 1. <b>wild-type (96.915)</b><br>2. pre-S1 del (2.701)<br>3. pre-S2 del (0.364)<br>4. pre-S1+pre-S2 del (0.020)<br>I. pre-S1 plus pre-S2 del (3.065)<br>II. pre-S1 plus pre-S1+pre-S2 del (2.721)<br>III. pre-S2 plus pre-S1+pre-S2 del (0.384)<br>IV. all three types of pre-S del (3.085) | 1. wild-type (96.915)<br>2. pre-S1 del (nt 3026-3205) (1.755)<br>3. pre-S2 del (nt 25-54) (0.148)<br>4. pre-S1+pre-S2 del (nt 2854-2988, 45-149) (0.004) |
| 19 | wild-type | 1. <b>wild-type (98.069)</b><br>2. pre-S1 del (1.263)<br>3. pre-S2 del (0.609)<br>4. pre-S1+pre-S2 del (0.059)<br>I. pre-S1 plus pre-S2 del (1.872)<br>II. pre-S1 plus pre-S1+pre-S2 del (1.322)<br>III. pre-S2 plus pre-S1+pre-S2 del (0.668)<br>IV. all three types of pre-S del (1.931) | 1. wild-type (98.069)<br>2. pre-S1 del (nt 3103-3126) (0.253)<br>3. pre-S2 del (nt 1-15) (0.535)<br>4. pre-S1+pre-S2 del (nt 2854-2996, 44-144) (0.015)  |

|    |                                              |                                                                                                                                                                                                                                                                                                                        |                                                                                                                                                         |
|----|----------------------------------------------|------------------------------------------------------------------------------------------------------------------------------------------------------------------------------------------------------------------------------------------------------------------------------------------------------------------------|---------------------------------------------------------------------------------------------------------------------------------------------------------|
| 20 | wild-type                                    | 1. <b>wild-type (69.571)</b><br>2. <b>pre-S2 del (18.590)</b><br>3. <b>pre-S1+pre-S2 del (8.224)</b><br>4. pre-S1 del (3.615)<br>I. pre-S1 plus pre-S2 del (22.205)<br>II. pre-S1 plus pre-S1+pre-S2 del (11.839)<br>III. pre-S2 plus pre-S1+pre-S2 del (26.814)<br>IV. all three types of pre-S del (30.429)          | 1. wild-type (69.571)<br>2. pre-S2 del (nt 1-54) (18.482)<br>3. pre-S1+pre-S2 del (nt 2855-2872, 1-54) (7.712)<br>4. pre-S1 del (nt 2855-2872) (2.674)  |
| 21 | wild-type                                    | 1. <b>pre-S2 del (41.477)</b><br>2. <b>pre-S1+pre-S2 del (39.126)</b><br>3. <b>wild-type (12.348)</b><br>4. <b>pre-S1 del (7.048)</b><br>I. pre-S1 plus pre-S2 del (48.525)<br>II. pre-S1 plus pre-S1+pre-S2 del (46.174)<br>III. pre-S2 plus pre-S1+pre-S2 del (80.603)<br>IV. all three types of pre-S del (87.652)  | 1. pre-S2 del (nt 1-54) (24.620)<br>2. pre-S1+pre-S2 del (nt 2855-2872, 1-54) (26.451)<br>3. wild-type (12.348)<br>4. pre-S1 del (nt 2855-2872) (4.978) |
| 22 | 1. wild-type<br>2. pre-S1 del (nt 2855-2872) | 1. <b>pre-S2 del (42.909)</b><br>2. <b>pre-S1+pre-S2 del (27.915)</b><br>3. <b>wild-type (17.564)</b><br>4. <b>pre-S1 del (11.612)</b><br>I. pre-S1 plus pre-S2 del (54.521)<br>II. pre-S1 plus pre-S1+pre-S2 del (39.527)<br>III. pre-S2 plus pre-S1+pre-S2 del (70.824)<br>IV. all three types of pre-S del (82.436) | 1. pre-S2 del (nt 1-54) (38.091)<br>2. pre-S1+pre-S2 del (2855-2872, 1-54) (25.090)<br>3. wild-type (17.564)<br>4. pre-S1 del (nt 2855-2872) (8.072)    |

|    |                                                              |                                                                                                                                                                                                                                                                                                                        |                                                                                                                                                                  |
|----|--------------------------------------------------------------|------------------------------------------------------------------------------------------------------------------------------------------------------------------------------------------------------------------------------------------------------------------------------------------------------------------------|------------------------------------------------------------------------------------------------------------------------------------------------------------------|
| 23 | 1. wild-type<br>2. pre-S1+pre-S2 del<br>(nt 2855-2872, 1-54) | 1. <b>wild-type (52.661)</b><br>2. <b>pre-S2 del (25.093)</b><br>3. <b>pre-S1+pre-S2 del (11.424)</b><br>4. <b>pre-S1 del (10.821)</b><br>I. pre-S1 plus pre-S2 del (36.724)<br>II. pre-S1 plus pre-S1+pre-S2 del (22.245)<br>III. pre-S2 plus pre-S1+pre-S2 del (36.517)<br>IV. all three types of pre-S del (47.339) | 1. wild-type (52.661)<br>2. pre-S2 del (nt 1-54) (18.682)<br>3. pre-S1+pre-S2 del (nt 2855-2872, 1-54) (8.344)<br>4. pre-S1 del (nt 2855-2872) (2.817)           |
| 24 | wild-type                                                    | 1. <b>wild-type (96.073)</b><br>2. pre-S1 del (1.895)<br>3. pre-S1+pre-S2 del (1.202)<br>4. pre-S2 del (0.830)<br>I. pre-S1 plus pre-S2 del (2.725)<br>II. pre-S1 plus pre-S1+pre-S2 del (3.097)<br>III. pre-S2 plus pre-S1+pre-S2 del (2.032)<br>IV. all three types of pre-S del (3.927)                             | 1. wild-type (96.073)<br>2. pre-S1 del (nt 2954-3097) (0.632)<br>3. pre-S1+pre-S2 del (nt 2855-2872, 1-54) (0.452)<br>4. pre-S2 del (nt 1-54) (0.382)            |
| 25 | wild-type                                                    | 1. <b>wild-type (93.547)</b><br>2. pre-S1 del (4.345)<br>3. pre-S2 del (1.844)<br>4. pre-S1+pre-S2 del (0.265)<br>I. pre-S1 plus pre-S2 del (6.189)<br>II. pre-S1 plus pre-S1+pre-S2 del (4.610)<br>III. pre-S2 plus pre-S1+pre-S2 del (2.109)<br>IV. all three types of pre-S del (6.453)                             | 1. wild-type (93.547)<br>2. pre-S1 del (nt 3026-3205) (0.869)<br>3. pre-S2 del (nt 1-54) (1.107)<br>4. pre-S1+pre-S2 del (nt 2855-2872, 2897-2923, 1-54) (0.180) |



|    |                                           |                                                                                                                                                                                                                                                                                                                      |                                                                                                                                                        |
|----|-------------------------------------------|----------------------------------------------------------------------------------------------------------------------------------------------------------------------------------------------------------------------------------------------------------------------------------------------------------------------|--------------------------------------------------------------------------------------------------------------------------------------------------------|
| 26 | wild-type                                 | 1. <b>wild-type (97.921)</b><br>2. pre-S1 del (1.388)<br>3. pre-S2 del (0.691)<br>4. pre-S1+pre-S2 del (0.000)<br>I. pre-S1 plus pre-S2 del (2.079)<br>II. pre-S1 plus pre-S1+pre-S2 del (1.388)<br>III. pre-S2 plus pre-S1+pre-S2 del (0.691)<br>IV. all three types of pre-S del (2.079)                           | 1. wild-type (97.921)<br>2. pre-S1 del (nt 3067-3162) (0.040)<br>3. pre-S2 del (nt 3211-3216) (0.046)<br>4. pre-S1+pre-S2 del (0.000)                  |
| 27 | pre-S1+pre-S2 del<br>(nt 2855-2872, 1-54) | 1. <b>wild-type (60.195)</b><br>2. <b>pre-S2 del (22.882)</b><br>3. <b>pre-S1+pre-S2 del (9.280)</b><br>4. <b>pre-S1 del (7.643)</b><br>I. pre-S1 plus pre-S2 del (30.525)<br>II. pre-S1 plus pre-S1+pre-S2 del (16.923)<br>III. pre-S2 plus pre-S1+pre-S2 del (32.162)<br>IV. all three types of pre-S del (39.805) | 1. wild-type (60.195)<br>2. pre-S2 del (nt 1-57) (22.473)<br>3. pre-S1+pre-S2 del (nt 2855-2872, 1-54) (4.815)<br>4. pre-S1 del (nt 3025-3126) (4.396) |
| 28 | wild-type                                 | 1. <b>pre-S1 del (75.113)</b><br>2. <b>wild-type (11.506)</b><br>3. <b>pre-S1+pre-S2 del (10.472)</b><br>4. pre-S2 del (2.909)<br>I. pre-S1 plus pre-S2 del (78.022)<br>II. pre-S1 plus pre-S1+pre-S2 del (85.585)<br>III. pre-S2 plus pre-S1+pre-S2 del (13.381)<br>IV. all three types of pre-S del (88.494)       | 1. pre-S1 del (nt 2855-2872) (5.979)<br>2. wild-type (11.506)<br>3. pre-S1+pre-S2 del (nt 2855-2872, 1-54) (8.016)<br>4. pre-S2 del (nt 1-54) (2.747)  |

|    |                           |                                                                                                                                                                                                                                                                                                       |                                                                                                                                                                  |
|----|---------------------------|-------------------------------------------------------------------------------------------------------------------------------------------------------------------------------------------------------------------------------------------------------------------------------------------------------|------------------------------------------------------------------------------------------------------------------------------------------------------------------|
| 29 | wild-type                 | 1. <b>wild-type (97.730)</b><br>2. pre-S1 del (1.691)<br>3. pre-S2 del (0.575)<br>4. pre-S1+pre-S2 del (0.004)<br>I. pre-S1 plus pre-S2 del (2.266)<br>II. pre-S1 plus pre-S1+pre-S2 del (1.695)<br>III. pre-S2 plus pre-S1+pre-S2 del (0.579)<br>IV. all three types of pre-S del (2.270)            | 1. wild-type (97.730)<br>2. pre-S1 del (nt 2855-2970) (0.217)<br>3. pre-S2 del (nt 1-12) (0.323)<br>4. pre-S1+pre-S2 del (nt 2855-2970, 1-54) (0.004)            |
| 30 | pre-S1 del (nt 3010-3075) | 1. <b>wild-type (87.018)</b><br>2. <b>pre-S1 del (11.703)</b><br>3. pre-S2 del (1.113)<br>4. pre-S1+pre-S2 del (0.166)<br>I. pre-S1 plus pre-S2 del (12.816)<br>II. pre-S1 plus pre-S1+pre-S2 del (11.869)<br>III. pre-S2 plus pre-S1+pre-S2 del (1.279)<br>IV. all three types of pre-S del (12.982) | 1. wild-type (87.018)<br>2. pre-S1 del (nt 3010-3075) (5.189)<br>3. pre-S2 del (nt 1-9) (0.392)<br>4. pre-S1+pre-S2 del (nt 3010-3075, 1-9) (0.046)              |
| 31 | pre-S1 del (nt 2910-3089) | 1. <b>wild-type (78.709)</b><br>2. <b>pre-S1 del (20.616)</b><br>3. pre-S2 del (0.646)<br>4. pre-S1+pre-S2 del (0.029)<br>I. pre-S1 plus pre-S2 del (21.262)<br>II. pre-S1 plus pre-S1+pre-S2 del (20.645)<br>III. pre-S2 plus pre-S1+pre-S2 del (0.675)<br>IV. all three types of pre-S del (21.291) | 1. wild-type (78.709)<br>2. pre-S1 del (nt 2910-3089) (9.181)<br>3. pre-S2 del (nt 1-15) (0.345)<br>4. pre-S1+pre-S2 del (nt 2910-3055, 3067-3089, 4-12) (0.007) |

|    |           |                                                                                                                                                                                                                                                                                                              |                                                                                                                                                       |
|----|-----------|--------------------------------------------------------------------------------------------------------------------------------------------------------------------------------------------------------------------------------------------------------------------------------------------------------------|-------------------------------------------------------------------------------------------------------------------------------------------------------|
| 32 | wild-type | 1. <b>wild-type (98.105)</b><br>2. pre-S1 del (1.152)<br>3. pre-S2 del (0.733)<br>4. pre-S1+pre-S2 del (0.010)<br>I. pre-S1 plus pre-S2 del (1.885)<br>II. pre-S1 plus pre-S1+pre-S2 del (1.162)<br>III. pre-S2 plus pre-S1+pre-S2 del (0.743)<br>IV. all three types of pre-S del (1.895)                   | 1. wild-type (98.105)<br>2. pre-S1 del (nt 2855-2970) (0.060)<br>3. pre-S2 del (nt 1-9) (0.408)<br>4. pre-S1+pre-S2 del (nt 2855-2872, 1-54) (0.003)  |
| 33 | wild-type | 1. <b>wild-type (80.067)</b><br>2. <b>pre-S2 del (9.477)</b><br>3. <b>pre-S1 del (8.993)</b><br>4. pre-S1+pre-S2 del (1.463)<br>I. pre-S1 plus pre-S2 del (18.470)<br>II. pre-S1 plus pre-S1+pre-S2 del (10.456)<br>III. pre-S2 plus pre-S1+pre-S2 del (10.940)<br>IV. all three types of pre-S del (19.933) | 1. wild-type (80.067)<br>2. pre-S2 del (nt 1-12) (8.957)<br>3. pre-S1 del (nt 2866-3075) (7.322)<br>4. pre-S1+pre-S2 del (nt 2866-3075, 1-9) (0.871)  |
| 34 | wild-type | 1. <b>wild-type (80.175)</b><br>2. <b>pre-S2 del (13.639)</b><br>3. <b>pre-S1 del (5.169)</b><br>4. pre-S1+pre-S2 del (1.017)<br>I. pre-S1 plus pre-S2 del (18.808)<br>II. pre-S1 plus pre-S1+pre-S2 del (6.186)<br>III. pre-S2 plus pre-S1+pre-S2 del (14.656)<br>IV. all three types of pre-S del (19.825) | 1. wild-type (80.175)<br>2. pre-S2 del (nt 1-30) (4.394)<br>3. pre-S1 del (nt 2865-2975) (2.356)<br>4. pre-S1+pre-S2 del (nt 2866-2975, 1-29) (0.212) |

|    |                                                                               |                                                                                                                                                                                                                                                                                                                |                                                                                                                                                         |
|----|-------------------------------------------------------------------------------|----------------------------------------------------------------------------------------------------------------------------------------------------------------------------------------------------------------------------------------------------------------------------------------------------------------|---------------------------------------------------------------------------------------------------------------------------------------------------------|
| 35 | wild-type                                                                     | 1. <b>wild-type (92.156)</b><br>2. <b>pre-S1 del (7.022)</b><br>3. pre-S2 del (0.793)<br>4. pre-S1+pre-S2 del (0.029)<br>I. pre-S1 plus pre-S2 del (7.815)<br>II. pre-S1 plus pre-S1+pre-S2 del (7.051)<br>III. pre-S2 plus pre-S1+pre-S2 del (0.822)<br>IV. all three types of pre-S del (7.844)              | 1. wild-type (92.156)<br>2. pre-S1 del (nt 2854-3018) (1.346)<br>3. pre-S2 del (nt 1-9) (0.323)<br>4. pre-S1+pre-S2 del (nt 2855-2872, 1-9) (0.004)     |
| 36 | 1. pre-S1 del (nt 2854-2970)<br>2. pre-S1+pre-S2 del<br>( nt 2855-2872, 1-54) | 1. <b>pre-S1+pre-S2 del (40.433)</b><br>2. <b>pre-S1 del (34.174)</b><br>3. <b>wild-type (20.822)</b><br>4. pre-S2 del (4.571)<br>I. pre-S1 plus pre-S2 del (38.745)<br>II. pre-S1 plus pre-S1+pre-S2 del (74.607)<br>III. pre-S2 plus pre-S1+pre-S2 del (45.004)<br>IV. all three types of pre-S del (79.178) | 1. pre-S1+pre-S2 del (nt 2855-2872, 1-54) (22.713)<br>2. pre-S1 del (nt 2854-2970) (22.956)<br>3. wild-type (20.822)<br>4. pre-S2 del (nt 1-54) (4.380) |
| 37 | wild-type                                                                     | 1. <b>wild-type (80.758)</b><br>2. <b>pre-S2 del (12.910)</b><br>3. <b>pre-S1 del (5.629)</b><br>4. pre-S1+pre-S2 del (0.704)<br>I. pre-S1 plus pre-S2 del (18.539)<br>II. pre-S1 plus pre-S1+pre-S2 del (6.333)<br>III. pre-S2 plus pre-S1+pre-S2 del (13.614)<br>IV. all three types of pre-S del (19.242)   | 1. wild-type (80.758)<br>2. pre-S2 del (nt 1-54) (6.944)<br>3. pre-S1 del (nt 2855-2875) (4.209)<br>4. pre-S1+pre-S2 del (nt 2855-2875, 1-54) (0.253)   |

|    |                           |                                                                                                                                                                                                                                                                                                       |                                                                                                                                                                   |
|----|---------------------------|-------------------------------------------------------------------------------------------------------------------------------------------------------------------------------------------------------------------------------------------------------------------------------------------------------|-------------------------------------------------------------------------------------------------------------------------------------------------------------------|
| 38 | pre-S1 del (nt 3021-3203) | 1. <b>wild-type (61.320)</b><br>2. <b>pre-S1 del (34.045)</b><br>3. pre-S2 del (3.491)<br>4. pre-S1+pre-S2 del (1.144)<br>I. pre-S1 plus pre-S2 del (37.536)<br>II. pre-S1 plus pre-S1+pre-S2 del (35.189)<br>III. pre-S2 plus pre-S1+pre-S2 del (4.635)<br>IV. all three types of pre-S del (38.680) | 1. wild-type (61.320)<br>2. pre-S1 del (nt 3021-3203) (23.818)<br>3. pre-S2 del (nt 6-41) (1.385)<br>4. pre-S1+pre-S2 del (nt 2855-2872, 2919-3126, 6-41) (0.163) |
| 39 | wild-type                 | 1. <b>wild-type (97.172)</b><br>2. pre-S1 del (1.957)<br>3. pre-S2 del (0.850)<br>4. pre-S1+pre-S2 del (0.021)<br>I. pre-S1 plus pre-S2 del (2.807)<br>II. pre-S1 plus pre-S1+pre-S2 del (1.978)<br>III. pre-S2 plus pre-S1+pre-S2 del (0.871)<br>IV. all three types of pre-S del (2.828)            | 1. wild-type (97.172)<br>2. pre-S1 del (nt 3021-3203) (0.353)<br>3. pre-S2 del (nt 1-12) (0.488)<br>4. pre-S1+pre-S2 del (nt 3078-3094, 6-41) (0.003)             |
| 40 | wild-type                 | 1. <b>wild-type (97.501)</b><br>2. pre-S1 del (1.586)<br>3. pre-S2 del (0.908)<br>4. pre-S1+pre-S2 del (0.005)<br>I. pre-S1 plus pre-S2 del (2.494)<br>II. pre-S1 plus pre-S1+pre-S2 del (1.591)<br>III. pre-S2 plus pre-S1+pre-S2 del (0.913)<br>IV. all three types of pre-S del (2.499)            | 1. wild-type (97.501)<br>2. pre-S1 del (nt 3107-3202) (0.081)<br>3. pre-S2 del (nt 1-12) (0.529)<br>4. pre-S1+pre-S2 del (nt 3133-3136, 1-10) (0.005)             |

|    |                           |                                                                                                                                                                                                                                                                                                       |                                                                                                                                                                 |
|----|---------------------------|-------------------------------------------------------------------------------------------------------------------------------------------------------------------------------------------------------------------------------------------------------------------------------------------------------|-----------------------------------------------------------------------------------------------------------------------------------------------------------------|
| 41 | pre-S1 del (nt 2858-2986) | 1. <b>pre-S1 del (84.262)</b><br>2. <b>wild-type (14.798)</b><br>3. pre-S1+pre-S2 del (0.779)<br>4. pre-S2 del (0.161)<br>I. pre-S1 plus pre-S2 del (84.423)<br>II. pre-S1 plus pre-S1+pre-S2 del (85.041)<br>III. pre-S2 plus pre-S1+pre-S2 del (0.940)<br>IV. all three types of pre-S del (85.202) | 1. pre-S1 del (nt 2858-2986) (82.700)<br>2. wild-type (14.798)<br>3. pre-S1+pre-S2 del (nt 2858-2981, 1-10) (0.268)<br>4. pre-S2 del (nt 1-33) (0.053)          |
| 42 | wild-type                 | 1. <b>wild-type (97.757)</b><br>2. pre-S1 del (1.305)<br>3. pre-S2 del (0.923)<br>4. pre-S1+pre-S2 del (0.015)<br>I. pre-S1 plus pre-S2 del (2.228)<br>II. pre-S1 plus pre-S1+pre-S2 del (1.320)<br>III. pre-S2 plus pre-S1+pre-S2 del (0.938)<br>IV. all three types of pre-S del (2.243)            | 1. wild-type (97.757)<br>2. pre-S1 del (nt 3106-3207) (0.060)<br>3. pre-S2 del (nt 3211-3213) (0.124)<br>4. pre-S1+pre-S2 del (nt 3069-3118, 3211-3212) (0.004) |
| 43 | wild-type                 | 1. <b>pre-S2 del (49.695)</b><br>2. <b>wild-type (49.248)</b><br>3. pre-S1+pre-S2 del (0.814)<br>4. pre-S1 del (0.242)<br>I. pre-S1 plus pre-S2 del (49.937)<br>II. pre-S1 plus pre-S1+pre-S2 del (1.056)<br>III. pre-S2 plus pre-S1+pre-S2 del (50.509)<br>IV. all three types of pre-S del (50.752) | 1. pre-S2 del (nt 37-54) (43.929)<br>2. wild-type (49.248)<br>3. pre-S1+pre-S2 del (nt 3139-3142, 37-54) (0.049)<br>4. pre-S1 del (nt 3103-3200) (0.019)        |

|    |           |                                                                                                                                                                                                                                                                                            |                                                                                                                                                      |
|----|-----------|--------------------------------------------------------------------------------------------------------------------------------------------------------------------------------------------------------------------------------------------------------------------------------------------|------------------------------------------------------------------------------------------------------------------------------------------------------|
| 44 | wild-type | 1. <b>wild-type (98.244)</b><br>2. pre-S1 del (1.113)<br>3. pre-S2 del (0.643)<br>4. pre-S1+pre-S2 del (0.000)<br>I. pre-S1 plus pre-S2 del (1.756)<br>II. pre-S1 plus pre-S1+pre-S2 del (1.113)<br>III. pre-S2 plus pre-S1+pre-S2 del (0.643)<br>IV. all three types of pre-S del (1.756) | 1. wild-type (98.244)<br>2. pre-S1 del (nt 3089-3202) (0.049)<br>3. pre-S2 del (nt 1-15) (0.319)<br>4. pre-S1+pre-S2 del (0.000)                     |
| 45 | wild-type | 1. <b>wild-type (97.534)</b><br>2. pre-S1 del (1.376)<br>3. pre-S2 del (1.076)<br>4. pre-S1+pre-S2 del (0.014)<br>I. pre-S1 plus pre-S2 del (2.452)<br>II. pre-S1 plus pre-S1+pre-S2 del (1.390)<br>III. pre-S2 plus pre-S1+pre-S2 del (1.090)<br>IV. all three types of pre-S del (2.466) | 1. wild-type (97.534)<br>2. pre-S1 del (nt 3106-3207) (0.063)<br>3. pre-S2 del (nt 1-9) (0.769)<br>4. pre-S1+pre-S2 del (nt 3095-3150, 1-12) (0.007) |
| 46 | wild-type | 1. <b>wild-type (97.735)</b><br>2. pre-S1 del (1.534)<br>3. pre-S2 del (0.731)<br>4. pre-S1+pre-S2 del (0.000)<br>I. pre-S1 plus pre-S2 del (2.265)<br>II. pre-S1 plus pre-S1+pre-S2 del (1.534)<br>III. pre-S2 plus pre-S1+pre-S2 del (0.731)<br>IV. all three types of pre-S del (2.265) | 1. wild-type (97.735)<br>2. pre-S1 del (nt 3138-3197) (0.111)<br>3. pre-S2 del (nt 1-9) (0.371)<br>4. pre-S1+pre-S2 del (0.000)                      |

|    |                                                         |                                                                                                                                                                                                                                                                                                                       |                                                                                                                                                              |
|----|---------------------------------------------------------|-----------------------------------------------------------------------------------------------------------------------------------------------------------------------------------------------------------------------------------------------------------------------------------------------------------------------|--------------------------------------------------------------------------------------------------------------------------------------------------------------|
| 47 | wild-type                                               | 1. <b>wild-type (78.334)</b><br>2. <b>pre-S1 del (20.695)</b><br>3. pre-S2 del (0.866)<br>4. pre-S1+pre-S2 del (0.105)<br>I. pre-S1 plus pre-S2 del (21.561)<br>II. pre-S1 plus pre-S1+pre-S2 del (20.800)<br>III. pre-S2 plus pre-S1+pre-S2 del (0.971)<br>IV. all three types of pre-S del (21.666)                 | 1. wild-type (78.334)<br>2. pre-S1 del (nt 2895-3140) (15.887)<br>3. pre-S2 del (nt 1-9) (0.279)<br>4. pre-S1+pre-S2 del (nt 2895-3141, 1-19, 23-27) (0.023) |
| 48 | 1. pre-S1 del (nt 2968-3093)<br>2. pre-S2 del (nt 1-54) | 1. <b>pre-S1 del (57.159)</b><br>2. <b>wild-type (20.456)</b><br>3. <b>pre-S2 del (13.666)</b><br>4. <b>pre-S1+pre-S2 del (8.719)</b><br>I. pre-S1 plus pre-S2 del (70.825)<br>II. pre-S1 plus pre-S1+pre-S2 del (65.878)<br>III. pre-S2 plus pre-S1+pre-S2 del (22.385)<br>IV. all three types of pre-S del (79.544) | 1. pre-S1 del (nt 2968-3093) (47.067)<br>2. wild-type (20.456)<br>3. pre-S2 del (nt 1-54) (8.120)<br>4. pre-S1+pre-S2 del (nt 2968-3093, 1-54) (3.469)       |
| 49 | wild-type                                               | 1. <b>wild-type (75.021)</b><br>2. <b>pre-S2 del (21.983)</b><br>3. pre-S1 del (2.327)<br>4. pre-S1+pre-S2 del (0.669)<br>I. pre-S1 plus pre-S2 del (24.310)<br>II. pre-S1 plus pre-S1+pre-S2 del (2.996)<br>III. pre-S2 plus pre-S1+pre-S2 del (22.652)<br>IV. all three types of pre-S del (24.979)                 | 1. wild-type (75.021)<br>2. pre-S2 del (nt 1-1) (19.454)<br>3. pre-S1 del (nt 2855-2872) (0.704)<br>4. pre-S1+pre-S2 del (nt 2855-2872, 1-54) (0.606)        |



|    |           |                                                                                                                                                                                                                                                                                            |                                                                                                                                                      |
|----|-----------|--------------------------------------------------------------------------------------------------------------------------------------------------------------------------------------------------------------------------------------------------------------------------------------------|------------------------------------------------------------------------------------------------------------------------------------------------------|
| 50 | wild-type | 1. <b>wild-type (98.169)</b><br>2. pre-S1 del (1.138)<br>3. pre-S2 del (0.693)<br>4. pre-S1+pre-S2 del (0.000)<br>I. pre-S1 plus pre-S2 del (1.831)<br>II. pre-S1 plus pre-S1+pre-S2 del (1.138)<br>III. pre-S2 plus pre-S1+pre-S2 del (0.693)<br>IV. all three types of pre-S del (1.831) | 1. wild-type (98.169)<br>2. pre-S1 del (nt 3138-3197) (0.067)<br>3. pre-S2 del (nt 1-9) (0.377)<br>4. pre-S1+pre-S2 del (0.000)                      |
| 51 | wild-type | 1. <b>wild-type (97.734)</b><br>2. pre-S1 del (1.546)<br>3. pre-S2 del (0.719)<br>4. pre-S1+pre-S2 del (0.000)<br>I. pre-S1 plus pre-S2 del (2.265)<br>II. pre-S1 plus pre-S1+pre-S2 del (1.546)<br>III. pre-S2 plus pre-S1+pre-S2 del (0.719)<br>IV. all three types of pre-S del (2.266) | 1. wild-type (97.734)<br>2. pre-S1 del (nt 3104-3202) (0.165)<br>3. pre-S2 del (nt 1-9) (0.377)<br>4. pre-S1+pre-S2 del (0.000)                      |
| 52 | wild-type | 1. <b>wild-type (98.167)</b><br>2. pre-S1 del (1.192)<br>3. pre-S2 del (0.617)<br>4. pre-S1+pre-S2 del (0.024)<br>I. pre-S1 plus pre-S2 del (1.809)<br>II. pre-S1 plus pre-S1+pre-S2 del (1.216)<br>III. pre-S2 plus pre-S1+pre-S2 del (0.641)<br>IV. all three types of pre-S del (1.833) | 1. wild-type (98.167)<br>2. pre-S1 del (nt 2854-3128) (0.132)<br>3. pre-S2 del (nt 1-9) (0.246)<br>4. pre-S1+pre-S2 del (nt 3022-3125, 1-55) (0.018) |

|    |           |                                                                                                                                                                                                                                                                                                       |                                                                                                                                                       |
|----|-----------|-------------------------------------------------------------------------------------------------------------------------------------------------------------------------------------------------------------------------------------------------------------------------------------------------------|-------------------------------------------------------------------------------------------------------------------------------------------------------|
| 53 | wild-type | 1. <b>wild-type (97.002)</b><br>2. pre-S1 del (2.144)<br>3. pre-S2 del (0.849)<br>4. pre-S1+pre-S2 del (0.005)<br>I. pre-S1 plus pre-S2 del (2.993)<br>II. pre-S1 plus pre-S1+pre-S2 del (2.149)<br>III. pre-S2 plus pre-S1+pre-S2 del (0.854)<br>IV. all three types of pre-S del (2.998)            | 1. wild-type (97.002)<br>2. pre-S1 del (nt 3026-3205) (0.927)<br>3. pre-S2 del (nt 1-9) (0.528)<br>4. pre-S1+pre-S2 del (nt 3020-3119, 1-55) (0.005)  |
| 54 | wild-type | 1. <b>wild-type (96.687)</b><br>2. pre-S1 del (2.625)<br>3. pre-S2 del (0.676)<br>4. pre-S1+pre-S2 del (0.013)<br>I. pre-S1 plus pre-S2 del (3.301)<br>II. pre-S1 plus pre-S1+pre-S2 del (2.638)<br>III. pre-S2 plus pre-S1+pre-S2 del (0.689)<br>IV. all three types of pre-S del (3.313)            | 1. wild-type (96.687)<br>2. pre-S1 del (nt 2855-2872) (1.117)<br>3. pre-S2 del (nt 1-12) (0.411)<br>4. pre-S1+pre-S2 del (nt 2855-2872, 1-17) (0.004) |
| 55 | wild-type | 1. <b>wild-type (64.666)</b><br>2. <b>pre-S1 del (34.582)</b><br>3. pre-S2 del (0.493)<br>4. pre-S1+pre-S2 del (0.259)<br>I. pre-S1 plus pre-S2 del (35.075)<br>II. pre-S1 plus pre-S1+pre-S2 del (34.841)<br>III. pre-S2 plus pre-S1+pre-S2 del (0.752)<br>IV. all three types of pre-S del (35.334) | 1. wild-type (64.666)<br>2. pre-S1 del (nt 2858-2986) (33.466)<br>3. pre-S2 del (nt 1-9) (0.303)<br>4. pre-S1+pre-S2 del (nt 2858-2981, 1-10) (0.069) |

|    |           |                                                                                                                                                                                                                                                                                                       |                                                                                                                                                        |
|----|-----------|-------------------------------------------------------------------------------------------------------------------------------------------------------------------------------------------------------------------------------------------------------------------------------------------------------|--------------------------------------------------------------------------------------------------------------------------------------------------------|
| 56 | wild-type | 1. <b>pre-S1 del (69.372)</b><br>2. <b>wild-type (30.404)</b><br>3. pre-S2 del (0.218)<br>4. pre-S1+pre-S2 del (0.005)<br>I. pre-S1 plus pre-S2 del (69.590)<br>II. pre-S1 plus pre-S1+pre-S2 del (69.377)<br>III. pre-S2 plus pre-S1+pre-S2 del (0.223)<br>IV. all three types of pre-S del (69.596) | 1. pre-S1 del (nt 2856-3101) (66.854)<br>2. wild-type (30.404)<br>3. pre-S2 del (nt 1-12) (0.130)<br>4. pre-S1+pre-S2 del (nt 2984-3098, 1-10) (0.002) |
| 57 | wild-type | 1. <b>wild-type (94.005)</b><br>2. pre-S1 del (3.729)<br>3. pre-S2 del (1.824)<br>4. pre-S1+pre-S2 del (0.442)<br>I. pre-S1 plus pre-S2 del (5.553)<br>II. pre-S1 plus pre-S1+pre-S2 del (4.171)<br>III. pre-S2 plus pre-S1+pre-S2 del (2.266)<br>IV. all three types of pre-S del (5.995)            | 1. wild-type (94.005)<br>2. pre-S1 del (nt 2895-3188) (0.677)<br>3. pre-S2 del (nt 1-54) (1.029)<br>4. pre-S1+pre-S2 del (nt 2855-2872, 1-54) (0.253)  |
| 58 | wild-type | 1. <b>wild-type (95.575)</b><br>2. pre-S1 del (2.481)<br>3. pre-S2 del (1.931)<br>4. pre-S1+pre-S2 del (0.013)<br>I. pre-S1 plus pre-S2 del (4.412)<br>II. pre-S1 plus pre-S1+pre-S2 del (2.494)<br>III. pre-S2 plus pre-S1+pre-S2 del (1.944)<br>IV. all three types of pre-S del (4.424)            | 1. wild-type (95.575)<br>2. pre-S1 del (nt 3039-3092) (0.590)<br>3. pre-S2 del (nt 1-12) (0.510)<br>4. pre-S1+pre-S2 del (nt 2854-2940, 1-144) (0.007) |

|    |                           |                                                                                                                                                                                                                                                                                                                       |                                                                                                                                                          |
|----|---------------------------|-----------------------------------------------------------------------------------------------------------------------------------------------------------------------------------------------------------------------------------------------------------------------------------------------------------------------|----------------------------------------------------------------------------------------------------------------------------------------------------------|
| 59 | pre-S2 del (nt 15-56)     | 1. <b>pre-S2 del (64.182)</b><br>2. <b>wild-type (32.367)</b><br>3. pre-S1+pre-S2 del (2.975)<br>4. pre-S1 del (0.476)<br>I. pre-S1 plus pre-S2 del (64.658)<br>II. pre-S1 plus pre-S1+pre-S2 del (3.451)<br>III. pre-S2 plus pre-S1+pre-S2 del (67.157)<br>IV. all three types of pre-S del (67.633)                 | 1. pre-S2 del (nt 15-56) (33.613)<br>2. wild-type (32.367)<br>3. pre-S1+pre-S2 del (nt 3088-3126, 15-56) (0.176)<br>4. pre-S1 del (nt 2923-3090) (0.073) |
| 60 | wild-type                 | 1. <b>pre-S1 del (38.192)</b><br>2. <b>wild-type (34.644)</b><br>3. <b>pre-S2 del (19.195)</b><br>4. <b>pre-S1+pre-S2 del (7.968)</b><br>I. pre-S1 plus pre-S2 del (57.387)<br>II. pre-S1 plus pre-S1+pre-S2 del (46.160)<br>III. pre-S2 plus pre-S1+pre-S2 del (27.163)<br>IV. all three types of pre-S del (65.356) | 1. pre-S1 del (nt 2854-2970) (27.998)<br>2. wild-type (30.404)<br>3. pre-S2 del (nt 1-54) (18.373)<br>4. pre-S1+pre-S2 del (nt 3025-3126, 1-57) (2.383)  |
| 61 | pre-S1 del (nt 2855-2965) | 1. <b>pre-S1 del (40.086)</b><br>2. <b>wild-type (34.919)</b><br>3. <b>pre-S2 del (16.065)</b><br>4. <b>pre-S1+pre-S2 del (8.930)</b><br>I. pre-S1 plus pre-S2 del (56.151)<br>II. pre-S1 plus pre-S1+pre-S2 del (49.016)<br>III. pre-S2 plus pre-S1+pre-S2 del (24.995)<br>IV. all three types of pre-S del (65.081) | 1. pre-S1 del (nt 2855-2965) (24.125)<br>2. wild-type (34.919)<br>3. pre-S2 del (nt 1-54) (15.565)<br>4. pre-S1+pre-S2 del (nt 3022-3126, 1-60) (2.911)  |

|    |                                           |                                                                                                                                                                                                                                                                                                                        |                                                                                                                                                                   |
|----|-------------------------------------------|------------------------------------------------------------------------------------------------------------------------------------------------------------------------------------------------------------------------------------------------------------------------------------------------------------------------|-------------------------------------------------------------------------------------------------------------------------------------------------------------------|
| 62 | pre-S1+pre-S2 del<br>(nt 2855-2872, 1-54) | 1. <b>pre-S1 del (29.181)</b><br>2. <b>wild-type (23.836)</b><br>3. <b>pre-S2 del (23.645)</b><br>4. <b>pre-S1+pre-S2 del (23.338)</b><br>I. pre-S1 plus pre-S2 del (52.826)<br>II. pre-S1 plus pre-S1+pre-S2 del (52.519)<br>III. pre-S2 plus pre-S1+pre-S2 del (46.983)<br>IV. all three types of pre-S del (76.164) | 1. pre-S1 del (nt 2856-2969) (17.015)<br>2. wild-type (23.836)<br>3. pre-S2 del (nt 1-54) (23.402)<br>4. pre-S1+pre-S2 del (nt 2855-2872, 1-54) (15.956)          |
| 63 | pre-S1 del (nt 2854-2970)                 | 1. <b>pre-S1 del (52.401)</b><br>2. <b>wild-type (42.979)</b><br>3. pre-S2 del (2.312)<br>4. pre-S1+pre-S2 del (2.308)<br>I. pre-S1 plus pre-S2 del (54.713)<br>II. pre-S1 plus pre-S1+pre-S2 del (54.709)<br>III. pre-S2 plus pre-S1+pre-S2 del (4.620)<br>IV. all three types of pre-S del (57.021)                  | 1. pre-S1 del (nt 2854-2970) (43.037)<br>2. wild-type (42.979)<br>3. pre-S2 del (nt 1-54) (1.977)<br>4. pre-S1+pre-S2 del (nt 2860-2880, 2954-3097, 1-15) (1.445) |
| 64 | wild-type                                 | 1. <b>pre-S1 del (41.155)</b><br>2. <b>wild-type (37.573)</b><br>3. <b>pre-S2 del (18.905)</b><br>4. pre-S1+pre-S2 del (2.367)<br>I. pre-S1 plus pre-S2 del (60.060)<br>II. pre-S1 plus pre-S1+pre-S2 del (43.522)<br>III. pre-S2 plus pre-S1+pre-S2 del (21.272)<br>IV. all three types of pre-S del (62.427)         | 1. pre-S1 del (nt 2854-2970) (35.773)<br>2. wild-type (37.573)<br>3. pre-S2 del (nt 1-54) (18.494)<br>4. pre-S1+pre-S2 del (nt 2855-2970, 1-54) (1.676)           |

|    |                                           |                                                                                                                                                                                                                                                                                                                        |                                                                                                                                                          |
|----|-------------------------------------------|------------------------------------------------------------------------------------------------------------------------------------------------------------------------------------------------------------------------------------------------------------------------------------------------------------------------|----------------------------------------------------------------------------------------------------------------------------------------------------------|
| 65 | wild-type                                 | 1. <b>pre-S1 del (63.334)</b><br>2. <b>wild-type (32.806)</b><br>3. pre-S2 del (1.965)<br>4. pre-S1+pre-S2 del (1.895)<br>I. pre-S1 plus pre-S2 del (65.229)<br>II. pre-S1 plus pre-S1+pre-S2 del (65.229)<br>III. pre-S2 plus pre-S1+pre-S2 del (3.860)<br>IV. all three types of pre-S del (67.194)                  | 1. pre-S1 del (nt 2854-2970) (33.450)<br>2. wild-type (32.806)<br>3. pre-S2 del (nt 1-54) (1.708)<br>4. pre-S1+pre-S2 del (nt 2855-2970, 1-54) (0.994)   |
| 66 | pre-S1+pre-S2 del<br>(nt 2855-2872, 1-54) | 1. <b>wild-type (30.973)</b><br>2. <b>pre-S1+pre-S2 del (27.774)</b><br>3. <b>pre-S1 del (27.161)</b><br>4. <b>pre-S2 del (14.091)</b><br>I. pre-S1 plus pre-S2 del (41.252)<br>II. pre-S1 plus pre-S1+pre-S2 del (54.935)<br>III. pre-S2 plus pre-S1+pre-S2 del (41.865)<br>IV. all three types of pre-S del (69.027) | 1. wild-type (30.973)<br>2. pre-S1+pre-S2 del (nt 2855-2872, 1-54) (24.398)<br>3. pre-S1 del (nt 2854-2970) (14.813)<br>4. pre-S2 del (nt 1-54) (13.846) |
| 67 | wild-type                                 | 1. <b>wild-type (46.914)</b><br>2. <b>pre-S1 del (45.517)</b><br>3. <b>pre-S2 del (6.834)</b><br>4. pre-S1+pre-S2 del (0.735)<br>I. pre-S1 plus pre-S2 del (52.351)<br>II. pre-S1 plus pre-S1+pre-S2 del (46.252)<br>III. pre-S2 plus pre-S1+pre-S2 del (7.569)<br>IV. all three types of pre-S del (53.086)           | 1. wild-type (46.914)<br>2. pre-S1 del (nt 2854-2970) (37.666)<br>3. pre-S2 del (nt 1-54) (5.216)<br>4. pre-S1+pre-S2 del (nt 2854-2970, 1-54) (0.307)   |

|    |                                           |                                                                                                                                                                                                                                                                                                                       |                                                                                                                                                         |
|----|-------------------------------------------|-----------------------------------------------------------------------------------------------------------------------------------------------------------------------------------------------------------------------------------------------------------------------------------------------------------------------|---------------------------------------------------------------------------------------------------------------------------------------------------------|
| 68 | pre-S1+pre-S2 del<br>(nt 2855-2872, 1-54) | 1. <b>pre-S1 del (43.130)</b><br>2. <b>wild-type (41.965)</b><br>3. <b>pre-S2 del (9.508)</b><br>4. <b>pre-S1+pre-S2 del (5.397)</b><br>I. pre-S1 plus pre-S2 del (52.638)<br>II. pre-S1 plus pre-S1+pre-S2 del (48.527)<br>III. pre-S2 plus pre-S1+pre-S2 del (14.905)<br>IV. all three types of pre-S del (58.035)  | 1. pre-S1 del (nt 2854-2970) (35.888)<br>2. wild-type (41.965)<br>3. pre-S2 del (nt 1-54) (9.239)<br>4. pre-S1+pre-S2 del (nt 2855-2872, 1-54) (4.160)  |
| 69 | pre-S1+pre-S2 del<br>(nt 2855-2872, 1-54) | 1. <b>wild-type (36.868)</b><br>2. <b>pre-S1 del (35.238)</b><br>3. <b>pre-S2 del (21.130)</b><br>4. <b>pre-S1+pre-S2 del (6.763)</b><br>I. pre-S1 plus pre-S2 del (56.368)<br>II. pre-S1 plus pre-S1+pre-S2 del (42.001)<br>III. pre-S2 plus pre-S1+pre-S2 del (27.893)<br>IV. all three types of pre-S del (63.132) | 1. wild-type (36.868)<br>2. pre-S1 del (nt 2854-2970) (29.499)<br>3. pre-S2 del (nt 1-54) (20.218)<br>4. pre-S1+pre-S2 del (nt 2855-2872, 1-54) (3.332) |
| 70 | pre-S1 del (nt 2854-3021)                 | 1. <b>wild-type (94.788)</b><br>2. <b>pre-S1 del (4.643)</b><br>3. pre-S2 del (0.455)<br>4. pre-S1+pre-S2 del (0.114)<br>I. pre-S1 plus pre-S2 del (5.098)<br>II. pre-S1 plus pre-S1+pre-S2 del (4.757)<br>III. pre-S2 plus pre-S1+pre-S2 del (0.569)<br>IV. all three types of pre-S del (5.212)                     | 1. wild-type (94.788)<br>2. pre-S1 del (nt 2854-3021) (3.404)<br>3. pre-S2 del (nt 1-15) (0.192)<br>4. pre-S1+pre-S2 del (nt 2855-2872, 1-54) (0.086)   |

|    |                                                         |                                                                                                                                                                                                                                                                                                                |                                                                                                                                                                             |
|----|---------------------------------------------------------|----------------------------------------------------------------------------------------------------------------------------------------------------------------------------------------------------------------------------------------------------------------------------------------------------------------|-----------------------------------------------------------------------------------------------------------------------------------------------------------------------------|
| 71 | wild-type                                               | 1. <b>pre-S2 del (54.981)</b><br>2. <b>wild-type (42.238)</b><br>3. pre-S1+pre-S2 del (2.274)<br>4. pre-S1 del (0.507)<br>I. pre-S1 plus pre-S2 del (55.488)<br>II. pre-S1 plus pre-S1+pre-S2 del (2.781)<br>III. pre-S2 plus pre-S1+pre-S2 del (57.255)<br>IV. all three types of pre-S del (57.762)          | 1. pre-S2 del (nt 48-56) (52.982)<br>2. wild-type (42.238)<br>3. pre-S1+pre-S2 del (nt 3026-3205, 48-56) (0.916)<br>4. pre-S1 del (nt 2854-3021) (0.334)                    |
| 72 | pre-S1 del (nt 2854-3021)                               | 1. <b>wild-type (91.511)</b><br>2. <b>pre-S1 del (7.310)</b><br>3. pre-S2 del (0.807)<br>4. pre-S1+pre-S2 del (0.373)<br>I. pre-S1 plus pre-S2 del (8.117)<br>II. pre-S1 plus pre-S1+pre-S2 del (7.683)<br>III. pre-S2 plus pre-S1+pre-S2 del (1.180)<br>IV. all three types of pre-S del (8.489)              | 1. wild-type (91.511)<br>2. pre-S1 del (nt 2854-3021) (5.744)<br>3. pre-S2 del (nt 48-56) (0.294)<br>4. pre-S1+pre-S2 del (nt 2855-2872, 1-54) (0.322)                      |
| 73 | pre-S1+pre-S2 del<br>(nt 2855-2872, 3012-3086,<br>1-51) | 1. <b>wild-type (52.297)</b><br>2. <b>pre-S1+pre-S2 del (31.339)</b><br>3. <b>pre-S1 del (12.863)</b><br>4. pre-S2 del (3.502)<br>I. pre-S1 plus pre-S2 del (16.365)<br>II. pre-S1 plus pre-S1+pre-S2 del (44.202)<br>III. pre-S2 plus pre-S1+pre-S2 del (34.841)<br>IV. all three types of pre-S del (47.703) | 1. wild-type (52.297)<br>2. pre-S1+pre-S2 del (nt 2855-2872, 3012-3086, 1-51) (8.935)<br>3. pre-S1 del (nt 2855-2872, 3012-3092) (6.480)<br>4. pre-S2 del (nt 1-51) (2.094) |



|    |                      |                                                                                                                                                                                                                                                                                                       |                                                                                                                                                         |
|----|----------------------|-------------------------------------------------------------------------------------------------------------------------------------------------------------------------------------------------------------------------------------------------------------------------------------------------------|---------------------------------------------------------------------------------------------------------------------------------------------------------|
| 74 | pre-S2 del (nt 1-57) | 1. <b>wild-type (58.984)</b><br>2. <b>pre-S2 del (34.533)</b><br>3. pre-S1+pre-S2 del (4.497)<br>4. pre-S1 del (1.986)<br>I. pre-S1 plus pre-S2 del (36.519)<br>II. pre-S1 plus pre-S1+pre-S2 del (6.483)<br>III. pre-S2 plus pre-S1+pre-S2 del (39.030)<br>IV. all three types of pre-S del (41.016) | 1. wild-type (58.984)<br>2. pre-S2 del (nt 1-57) (20.926)<br>3. pre-S1+pre-S2 del (nt 3026-3205, 2-55) (0.590)<br>4. pre-S1 del (nt 2944-3120) (1.128)  |
| 75 | wild-type            | 1. <b>wild-type (97.112)</b><br>2. pre-S1 del (2.178)<br>3. pre-S2 del (0.679)<br>4. pre-S1+pre-S2 del (0.031)<br>I. pre-S1 plus pre-S2 del (2.857)<br>II. pre-S1 plus pre-S1+pre-S2 del (2.209)<br>III. pre-S2 plus pre-S1+pre-S2 del (0.710)<br>IV. all three types of pre-S del (2.888)            | 1. wild-type (97.112)<br>2. pre-S1 del (nt 2854-3021) (0.641)<br>3. pre-S2 del (nt 25-54) (0.355)<br>4. pre-S1+pre-S2 del (nt 2855-2970, 25-54) (0.007) |

<sup>a</sup>All the PCR bands visualized in agarose gel were analyzed and listed in descending size order.

<sup>b</sup>The total frequency of pre-S gene DNA in each type of pre-S deletion was shown in descending order (1-4).

<sup>c</sup>The pre-S gene DNA with the highest frequency in each type of pre-S deletion was shown.

<sup>d</sup>The pre-S deletion type above the cut-off percentage (4.643) was shown in bold.

<sup>e</sup>Combination of different types of pre-S deletions was shown (I-IV).

Abbreviations: nt, nucleotide; del, deletion.

**Table S2. Univariate and multivariate analyses of pre-S deletion type for overall survival in 75 HBV-related HCC patients**

| Characteristics                                                           | Univariate Analysis |               |         | Multivariate Analysis |             |         |
|---------------------------------------------------------------------------|---------------------|---------------|---------|-----------------------|-------------|---------|
|                                                                           | HR                  | 95% CI        | P value | HR                    | 95% CI      | P value |
| Age (years) (>50 vs. ≤50)                                                 | 0.764               | 0.270-2.159   | 0.6109  |                       |             |         |
| Gender (men vs. women)                                                    | 1.462               | 0.191-11.179  | 0.7143  |                       |             |         |
| Smoking (yes vs. no)                                                      | 1.004               | 0.357-2.821   | 0.9947  |                       |             |         |
| Alcohol (yes vs. no)                                                      | 2.048               | 0.760-5.524   | 0.1566  |                       |             |         |
| HBsAg (positive vs. negative) <sup>a</sup>                                |                     |               |         |                       |             |         |
| HBeAg (positive vs. negative) <sup>b</sup>                                | 0.635               | 0.083-4.861   | 0.6616  |                       |             |         |
| HBV genotype (B vs. C)                                                    | 1.296               | 0.292-5.752   | 0.7332  |                       |             |         |
| HBV DNA (IU/mL) (>1×10 <sup>4</sup> vs. ≤1×10 <sup>4</sup> ) <sup>c</sup> | 1.682               | 0.561-5.043   | 0.3537  |                       |             |         |
| Albumin (g/dL) (>3.8 vs. ≤3.8)                                            | 0.425               | 0.135-1.341   | 0.1444  |                       |             |         |
| AST (U/L) (>34 vs. ≤34)                                                   | 1.323               | 0.298-5.864   | 0.7126  |                       |             |         |
| ALT (U/L) (>40 vs. ≤40)                                                   | 0.849               | 0.307-2.349   | 0.7530  |                       |             |         |
| AFP (ng/mL) (>400 vs. ≤400)                                               | 2.542               | 0.937-6.895   | 0.0669  |                       |             |         |
| Tumor size (cm) (>5 vs. ≤5)                                               | 1.605               | 0.581-4.437   | 0.3615  |                       |             |         |
| Tumor encapsulation (yes vs. no) <sup>d</sup>                             | 0.386               | 0.124-1.199   | 0.0997  |                       |             |         |
| Lymph node involvement (yes vs. no)                                       | 0.513               | 0.067-3.899   | 0.5186  |                       |             |         |
| Portal vein thrombosis (yes vs. no)                                       | 1.981               | 0.444-8.834   | 0.3701  |                       |             |         |
| Vascular invasion (yes vs. no)                                            | 1.930               | 0.680-5.480   | 0.2169  |                       |             |         |
| Distant metastasis (yes vs. no)                                           | 3.336               | 0.924-12.040  | 0.0658  |                       |             |         |
| Steatosis grade (2/3 vs. 0/1) <sup>e</sup>                                | 21.354              | 1.329-343.018 | 0.0307* |                       |             |         |
| Metavir inflammation score (2/3 vs. 0/1) <sup>f</sup>                     | 1.474               | 0.284-7.645   | 0.6438  |                       |             |         |
| Ishak fibrosis score (4/5/6 vs. 0/1/2/3) <sup>g</sup>                     | 1.153               | 0.324-4.100   | 0.8263  |                       |             |         |
| Child-Pugh cirrhosis score (B/C vs. A)                                    | 2.953               | 1.044-8.356   | 0.0413* | 2.974                 | 1.035-8.549 | 0.0430* |
| CLIP score (4/5/6 vs. 0/1/2/3)                                            | 5.233               | 0.675-40.579  | 0.1133  |                       |             |         |

|                                                   |       |              |         |       |             |         |
|---------------------------------------------------|-------|--------------|---------|-------|-------------|---------|
| Tumor differentiation grade (3/4 vs. 1/2)         | 0.818 | 0.291-2.301  | 0.7040  |       |             |         |
| BCLC stage (C/D vs. A/B)                          | 1.314 | 0.296-5.834  | 0.7199  |       |             |         |
| AJCC TNM stage (IIIA/IIIB/IIIC/IVA/IVB vs. I/II)  | 3.113 | 1.053-9.201  | 0.0400* | 3.146 | 1.041-9.510 | 0.0423* |
| Antiviral therapy after surgery (yes vs. no)      | 0.746 | 0.279-1.993  | 0.5590  |       |             |         |
| Del spanning pre-S gene segments (yes vs. no)     | 1.051 | 0.373-2.962  | 0.9250  |       |             |         |
| Only pre-S1 del (yes vs. no)                      | 1.324 | 0.454-3.868  | 0.6073  |       |             |         |
| Only pre-S2 del (yes vs. no)                      | 0.814 | 0.107-6.206  | 0.8423  |       |             |         |
| Only pre-S1+pre-S2 del (yes vs. no) <sup>h</sup>  |       |              |         |       |             |         |
| Both pre-S1 and pre-S2 del (yes vs. no)           | 3.216 | 0.708-14.615 | 0.1304  |       |             |         |
| Both pre-S1 and pre-S1+pre-S2 del (yes vs. no)    | 1.606 | 0.209-12.326 | 0.6487  |       |             |         |
| Both pre-S2 and pre-S1+pre-S2 del (yes vs. no)    | 0.000 | 0.000        | 0.9937  |       |             |         |
| All three types of pre-S del (yes vs. no)         | 0.302 | 0.039-2.366  | 0.2542  |       |             |         |
| Del spanning the pre-S1 gene segment (yes vs. no) | 1.110 | 0.402-3.065  | 0.8407  |       |             |         |
| Del spanning the pre-S2 gene segment (yes vs. no) | 0.818 | 0.283-2.366  | 0.7104  |       |             |         |

<sup>a</sup>There were no patients negative for HBsAg for analysis.

<sup>b</sup>Only 71 patients with available data were analyzed.

<sup>c</sup>Only 74 patients with available data were analyzed.

<sup>d</sup>Only 62 patients with available data were analyzed.

<sup>e</sup>Only 25 patients with available data were analyzed and thus excluded from multivariate analysis.

<sup>f</sup>Only 44 patients with available data were analyzed.

<sup>g</sup>Only 56 patients with available data were analyzed.

<sup>h</sup>There were no patients with only pre-S1+pre-S2 del for analysis.

\*, P value<0.05.

Abbreviations: HR, hazard ratio; CI, confidence interval; del, deletion.

**Table S3. Univariate and multivariate analyses of pre-S deletion percentage for overall survival in 75 HBV-related HCC patients**

| Characteristics                                  | Univariate Analysis |             |         | Multivariate Analysis |             |         |
|--------------------------------------------------|---------------------|-------------|---------|-----------------------|-------------|---------|
|                                                  | HR                  | 95% CI      | P value | HR                    | 95% CI      | P value |
| Child-Pugh cirrhosis score (B/C vs. A)           | 2.953               | 1.044-8.356 | 0.0413* | 2.974                 | 1.035-8.549 | 0.0430* |
| AJCC TNM stage (IIIA/IIIB/IIIC/IVA/IVB vs. I/II) | 3.113               | 1.053-9.201 | 0.0400* | 3.146                 | 1.041-9.510 | 0.0423* |
| Pre-S1 del percentage <sup>a</sup>               |                     |             |         |                       |             |         |
| II (>1.895) vs. I (≤1.895) <sup>b</sup>          | 1.630               | 0.402-6.603 | 0.4938  |                       |             |         |
| III (>5.629) vs. I (≤1.895)                      | 1.061               | 0.214-5.263 | 0.9426  |                       |             |         |
| IV (>28.270) vs. I (≤1.895)                      | 1.396               | 0.306-6.367 | 0.6664  |                       |             |         |
| Pre-S2 del percentage                            |                     |             |         |                       |             |         |
| II (>0.643) vs. I (≤0.643)                       | 1.482               | 0.387-5.669 | 0.5658  |                       |             |         |
| III (>1.824) vs. I (≤0.643)                      | 1.276               | 0.317-5.129 | 0.7315  |                       |             |         |
| IV (>13.666) vs. I (≤0.643)                      | 1.100               | 0.241-5.011 | 0.9024  |                       |             |         |
| Pre-S1+pre-S2 del percentage                     |                     |             |         |                       |             |         |
| II (>0.015) vs. I (≤0.015)                       | 1.126               | 0.311-4.070 | 0.8567  |                       |             |         |
| III (>0.442) vs. I (≤0.015)                      | 0.766               | 0.171-3.439 | 0.7282  |                       |             |         |
| IV (>2.975) vs. I (≤0.015)                       | 0.717               | 0.157-3.287 | 0.6687  |                       |             |         |
| Pre-S1 plus pre-S2 del percentage                |                     |             |         |                       |             |         |
| II (>2.725) vs. I (≤2.725)                       | 1.846               | 0.473-7.209 | 0.3776  |                       |             |         |
| III (>18.539) vs. I (≤2.725)                     | 0.295               | 0.031-2.846 | 0.2913  |                       |             |         |
| IV (>49.938) vs. I (≤2.725)                      | 1.696               | 0.399-7.206 | 0.4745  |                       |             |         |
| Pre-S1 plus pre-S1+pre-S2 del percentage         |                     |             |         |                       |             |         |
| II (>2.043) vs. I (≤2.043)                       | 0.728               | 0.178-2.986 | 0.6595  |                       |             |         |
| III (>6.332) vs. I (≤2.043)                      | 1.108               | 0.297-4.136 | 0.8782  |                       |             |         |
| IV (>44.201) vs. I (≤2.043)                      | 0.767               | 0.164-3.589 | 0.7360  |                       |             |         |
| Pre-S2 plus pre-S1+pre-S2 del percentage         |                     |             |         |                       |             |         |

|                             |       |             |        |
|-----------------------------|-------|-------------|--------|
| II (>0.689) vs. I (≤0.689)  | 1.819 | 0.500-6.615 | 0.3639 |
| III (>2.109) vs. I (≤0.689) | 1.137 | 0.283-4.563 | 0.8564 |
| IV (>24.995) vs. I (≤0.689) | 0.771 | 0.139-4.292 | 0.7668 |

#### All three types of pre-S del percentage

|                              |       |             |        |
|------------------------------|-------|-------------|--------|
| II (>2.828) vs. I (≤2.828)   | 1.035 | 0.288-3.718 | 0.9580 |
| III (>21.666) vs. I (≤2.828) | 0.208 | 0.023-1.866 | 0.1606 |
| IV (>58.035) vs. I (≤2.828)  | 1.499 | 0.391-5.747 | 0.5548 |

<sup>a</sup>Patients were divided into quarters of the distribution of indicated type of pre-S del percentage from the lowest to the highest (designated I to IV, respectively).

<sup>b</sup>Threshold percentage of indicated pre-S del type for each quarter was shown in parenthesis.

\*, P value<0.05.

Abbreviations: HR, hazard ratio; CI, confidence interval; del, deletion.

**Table S4. Univariate and multivariate analyses of combined pre-S deletion for overall survival in 75 HBV-related HCC patients**

| Characteristics                                  | Univariate Analysis |             |         | Multivariate Analysis |             |         |
|--------------------------------------------------|---------------------|-------------|---------|-----------------------|-------------|---------|
|                                                  | HR                  | 95% CI      | P value | HR                    | 95% CI      | P value |
| Child-Pugh cirrhosis score (B/C vs. A)           | 2.953               | 1.044-8.356 | 0.0413* | 2.974                 | 1.035-8.549 | 0.0430* |
| AJCC TNM stage (IIIA/IIIB/IIIC/IVA/IVB vs. I/II) | 3.113               | 1.053-9.201 | 0.0400* | 3.146                 | 1.041-9.510 | 0.0423* |
| Combined pre-S del <sup>a</sup>                  |                     |             |         |                       |             |         |
| com-II <sup>b</sup> vs. com-I                    |                     |             |         |                       |             |         |
| com-III vs. com-I                                | 1.101               | 0.297-4.074 | 0.8859  |                       |             |         |
| com-IV vs. com-I                                 | 0.597               | 0.132-2.702 | 0.5029  |                       |             |         |

<sup>a</sup>Patients were divided into four groups based on pre-S del types and percentages: com-I, del spanning the pre-S2 gene segment (no) & pre-S2 plus pre-S1+pre-S2 del percentage (I/II/III); com-II, del spanning the pre-S2 gene segment (no) & pre-S2 plus pre-S1+pre-S2 del percentage (IV); com-III, del spanning the pre-S2 gene segment (yes) & pre-S2 plus pre-S1+pre-S2 del percentage (I/II/III); and com-IV, del spanning the pre-S2 gene segment (yes) & pre-S2 plus pre-S1+pre-S2 del percentage (IV).

<sup>b</sup>There were no patients falling into the com-II group for analysis.

\*, P value<0.05.

Abbreviations: HR, hazard ratio; CI, confidence interval; del, deletion; com, combined.
