# Supplementary material for: Next-Generation Sequencing-Based Quantitative Detection of Hepatitis B Virus Pre-S Mutants in Plasma Predicts Hepatocellular Carcinoma Recurrence
Source: MDPI journal article supplement (doi:10.3390/v12080796), 2020-07-24
Supplement: s1 [file s1]

## Supporting figure legends

### **Figure S1. Kaplan-Meier curves of OS and RFS differences in the 75**

**HBV-related HCC patients after surgical resection.** (A) OS in all patients without grouping. (B) RFS in all patients without grouping. OS and RFS rate was plotted against months after surgery.

### **Figure S2. Kaplan-Meier curves of OS differences in the 75 HBV-related HCC**

**patients after surgical resection.** (A) OS in patients with Child-Pugh cirrhosis score

A versus B/C. (B) OS in patients with AJCC TNM stage I/II versus

IIIA/IIIB/IIIC/IVA/IVB. (C) OS in patients with (yes) versus without (no) deletions

spanning the pre-S2 gene segment. (D) OS in patients with pre-S2 plus pre-S1+pre-S2

deletions percentage I versus II, III, or IV. (E) OS in patients with combined pre-S

deletions com-I versus com-III or com-IV. OS rate was plotted against months after

surgery. *P* values and numbers of patients were indicated in the plots. A *P* value <

0.05 was considered significant.
